# Supplementary material
Source: PubMed Central journal article supplement (PMC2802902)
Supplement: me.2009-0252_1.pdf [file me.2009-0252_1.pdf]

***Supplemental Figure S1. ChIP-chip signal intensity peaks of several positive and negative ER binding regions.*** The regions were selected randomly from our ChIP-chip raw data. In the diagram, the Y-axis represents the log2 signal intensity (ER ChIP over Input), and the X-axis represents the genomic locations. The regions being covered by our probes are indicated in each figure.

***Supplemental Figure S2. Frequency of number of ERE motifs found in ER binding regions.*** Cells containing ER $\alpha$  and/or ER $\beta$ , as indicated, were treated with E2, and the frequency of EREs within ER binding regions was determined.

## Regions binding ER:

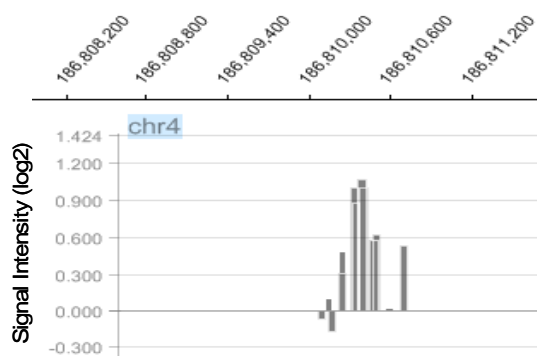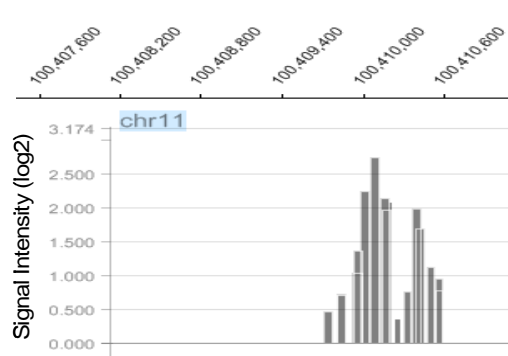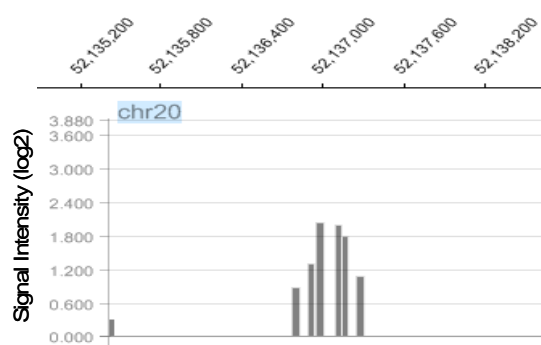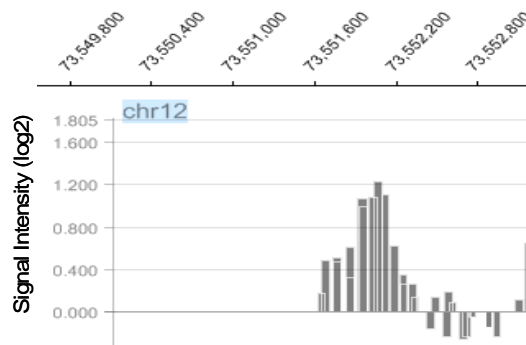

## Regions not binding ER:

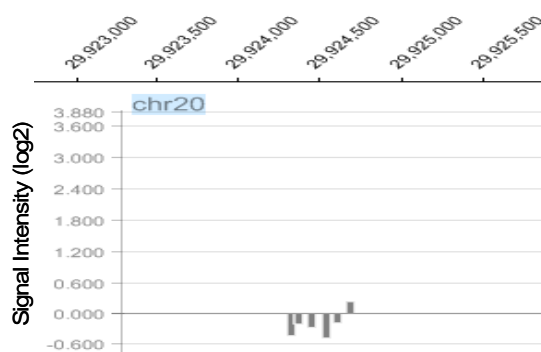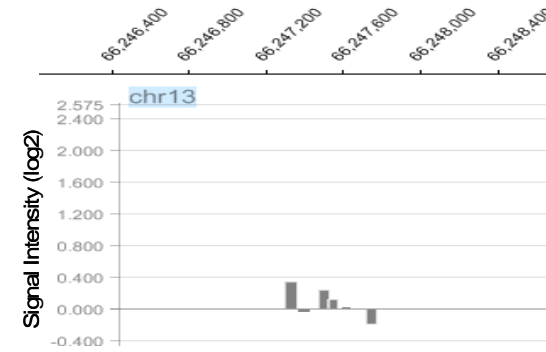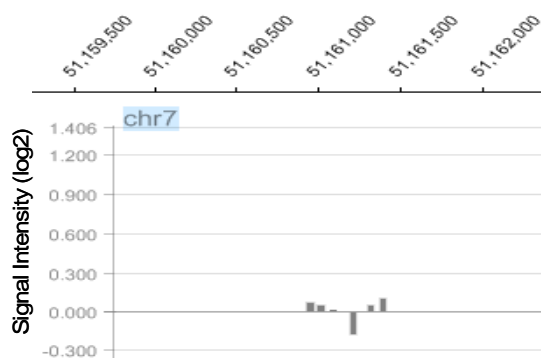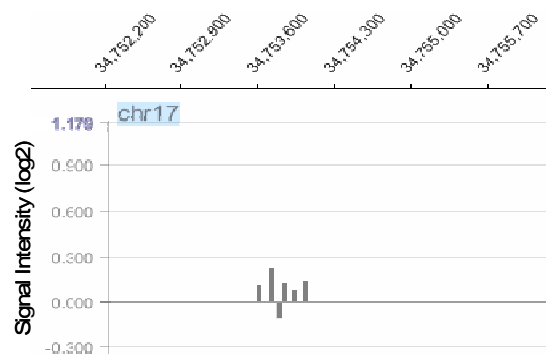

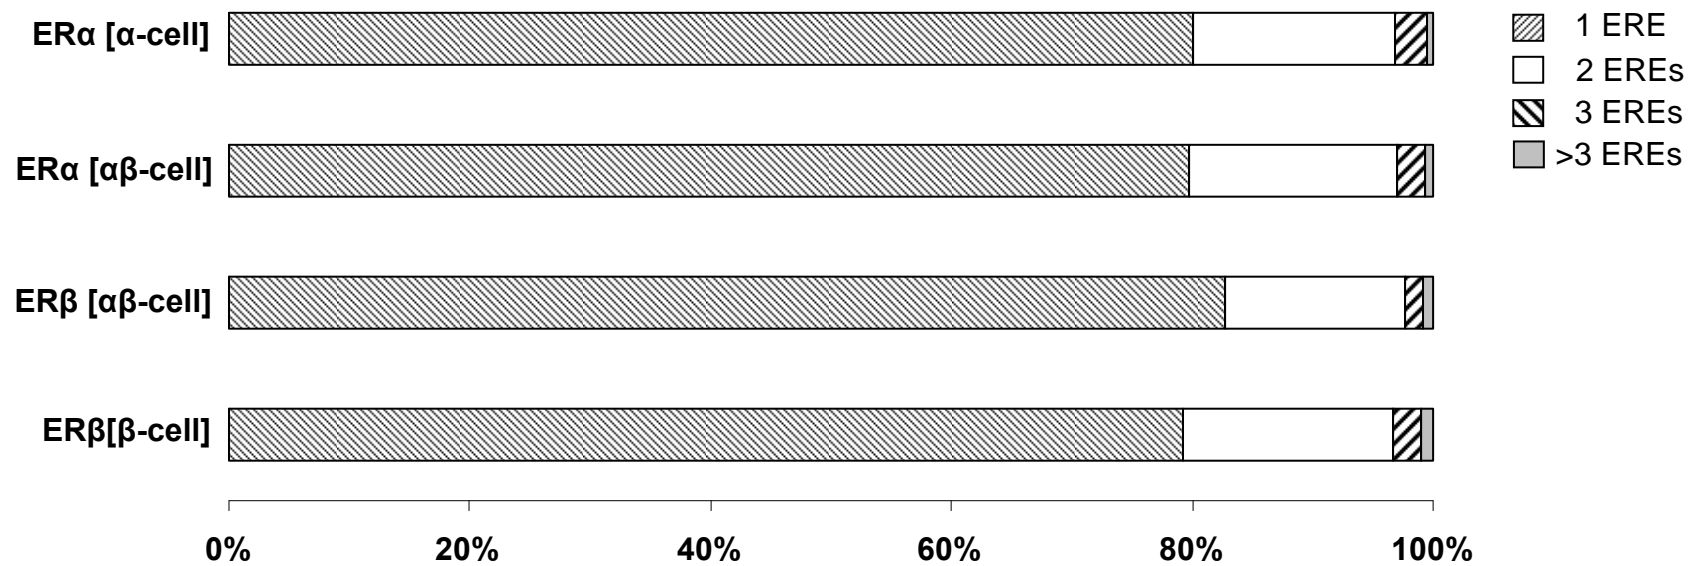

Figure S2

**Supplemental Table S1. Validation of ChIP-chip binding sites.** ER $\alpha$  and ER $\beta$  chromatin binding (by conventional ChIP assays) was measured by quantitative PCR after 45 min of E<sub>2</sub> treatment of MCF-7 cells differentially expressing ER $\alpha$  and/or ER $\beta$ . The binding sites were considered validated if their qPCR enrichment (ER ChIP over Input) was greater than 2 fold, with values at different sites ranging up to 400 fold.

|                                              | ER $\alpha$ [ $\alpha$ -cell] | ER $\alpha$ [ $\alpha\beta$ -cell] | ER $\beta$ [ $\alpha\beta$ -cell] | ER $\beta$ [ $\beta$ -cell] |
|----------------------------------------------|-------------------------------|------------------------------------|-----------------------------------|-----------------------------|
| <b>Number of random binding sites tested</b> | <b>12 sites</b>               | <b>12 sites</b>                    | <b>9 sites</b>                    | <b>9 sites</b>              |
| <b>Number of validated binding sites</b>     | <b>11 sites</b>               | <b>11 sites</b>                    | <b>8 sites</b>                    | <b>9 sites</b>              |
| <b>False-positive error rate</b>             | <b>8.3%</b>                   | <b>8.3%</b>                        | <b>11.1%</b>                      | <b>0%</b>                   |

**Supplemental Table S2. Distribution of ER binding sites mapped onto the five categories of sites on the NimbleGen arrays.**

|   | <b>Binding sites</b>               | <b>Ligand</b> | <b>Cat 1</b> | <b>Cat 2</b> | <b>Cat 3</b> | <b>Cat 4</b> | <b>Cat 5</b> |
|---|------------------------------------|---------------|--------------|--------------|--------------|--------------|--------------|
| 1 | ER $\alpha$ [ $\alpha$ cells]      | E2            | 42%          | 13%          | 30%          | 14%          | 1%           |
| 2 | ER $\alpha$ [ $\alpha$ cells]      | PPT           | 40%          | 14%          | 36%          | 10%          | ~0%          |
| 3 | ER $\alpha$ [ $\alpha\beta$ cells] | E2            | 39%          | 13%          | 36%          | 11%          | 1%           |
| 4 | ER $\beta$ [ $\alpha\beta$ cells]  | E2            | 32%          | 15%          | 42%          | 15%          | 1%           |
| 5 | ER $\alpha$ [ $\alpha\beta$ cells] | PPT           | 39%          | 13%          | 35%          | 12%          | 1%           |
| 6 | ER $\beta$ [ $\alpha\beta$ cells]  | ERB-041       | 17%          | 27%          | 47%          | 9%           | ~0%          |
| 7 | ER $\beta$ [ $\beta$ cells]        | E2            | 23%          | 21%          | 44%          | 11%          | 1%           |
| 8 | ER $\beta$ [ $\beta$ cells]        | ERB-041       | 9%           | 40%          | 32%          | 18%          | 1%           |

Cat 1: ChIP-chip ER binding regions (taken from Carroll et al. 2006)\*

Cat 2: ChIP-PET ER binding regions (taken from Lin et al. 2007)\*

Cat 3: Overlapping ER binding regions from both ChIP-chip and ChIP-PET

Cat 4: Computational predicted ERE regions (taken from Vega et al. 2006)

Cat 5: Control regions

\*Binding regions from Cat 3 have been removed from Cat 1 and Cat 2 to avoid double-counting
